# Supplementary material
Source: PubMed Central journal article supplement (PMC10060258)
Supplement: 41598_2023_31835_MOESM1_ESM.pdf [file 41598_2023_31835_MOESM1_ESM.pdf]

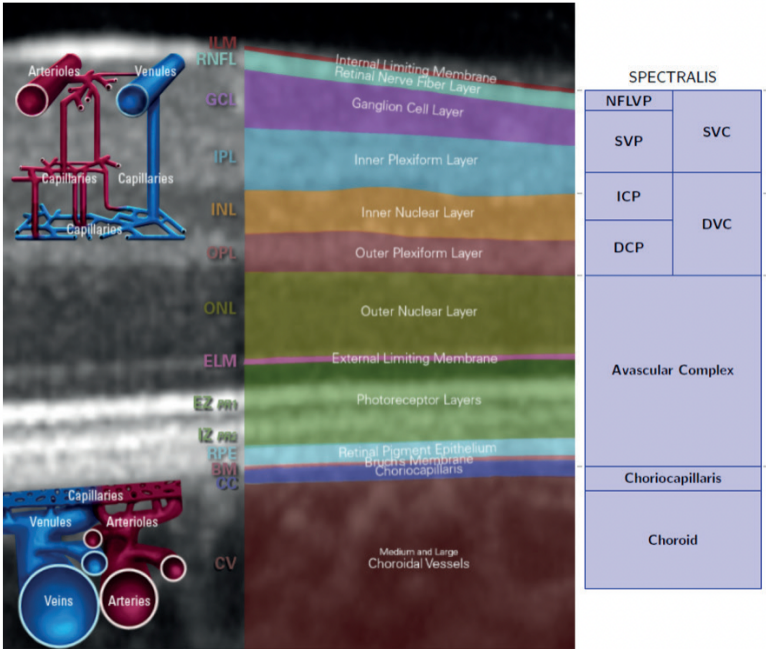

**Figure S1. Heidelberg Spectralis SD-OCT and OCTA layers.**

SD-OCT – Spectral-Domain Optical coherence tomography, NFLVP – Nerve fiber layer vascular plexus, SVP – Superficial vascular plexus, ICP – Intermediate capillary plexus, DCP – Deep capillary plexus, SVC – Superficial vascular complex, DVC – Deep vascular complex

\*Figure was obtained with permission from Heidelberg Engineering - Heidelberg Spectralis OCTA manual<sup>35</sup>
