# Supplementary material
Source: PubMed Central journal article supplement (PMC10060258)
Supplement: 41598_2023_31835_MOESM2_ESM.pdf [file 41598_2023_31835_MOESM2_ESM.pdf]

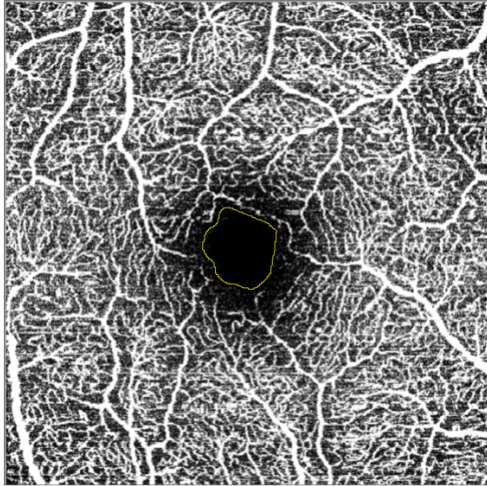

**Figure S2. Manual measurement of the FAZ using the ImageJ software. The image was obtained from the SVP slab of the OCTA. The encircled yellow area corresponds to the region devoid of flow or hyperreflective signal.**

FAZ – Foveal avascular zone, SVP – Superficial vascular plexus, OCTA – Optical coherence tomography angiography
